# Supplementary material for: Twist1 is highly expressed in cancer-associated fibroblasts of esophageal squamous cell carcinoma with a prognostic significance
Source: PubMed Central journal article supplement (PMC5630329; doi:10.18632/oncotarget.17941), 2017-05-17
Supplement: oncotarget-08-65265-s001.pdf [file oncotarget-08-65265-s001.pdf]

# Twist1 is highly expressed in cancer-associated fibroblasts of esophageal squamous cell carcinoma with a prognostic significance

## SUPPLEMENTARY MATERIALS

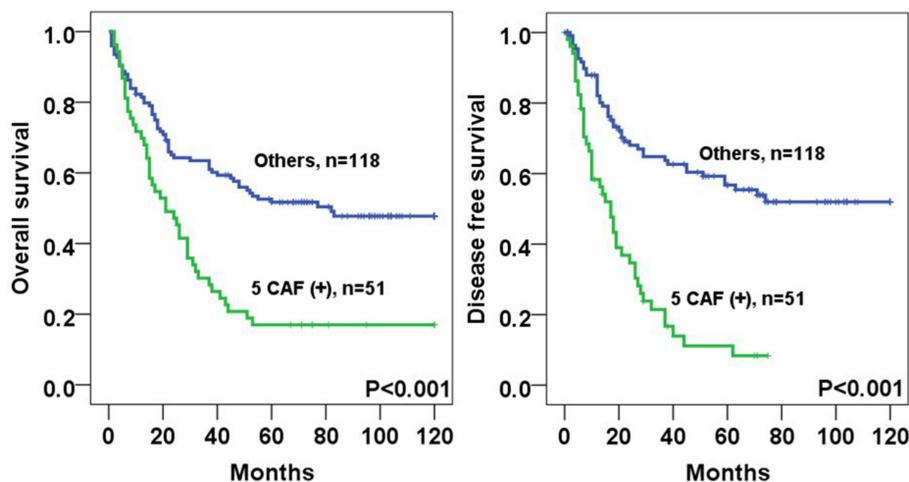

Supplementary Figure 1: Kaplan Meier survival curves of patients with esophageal squamous cell carcinoma (ESCC) according to expression of 5 cancer associated fibroblast (CAF) markers (Twist1, FSP1, SMA, Tenascin C, PDGFRa). Patients with ESCC showing expression of all 5 CAF markers showed significantly reduced overall survival and disease free survival rate than other patients
